# Supplementary material
Source: PubMed Central journal article supplement (PMC5004208)
Supplement: NIHMS809779-supplement-01.pdf [file NIHMS809779-supplement-01.pdf]

DOI: 10.1038/ncb3369

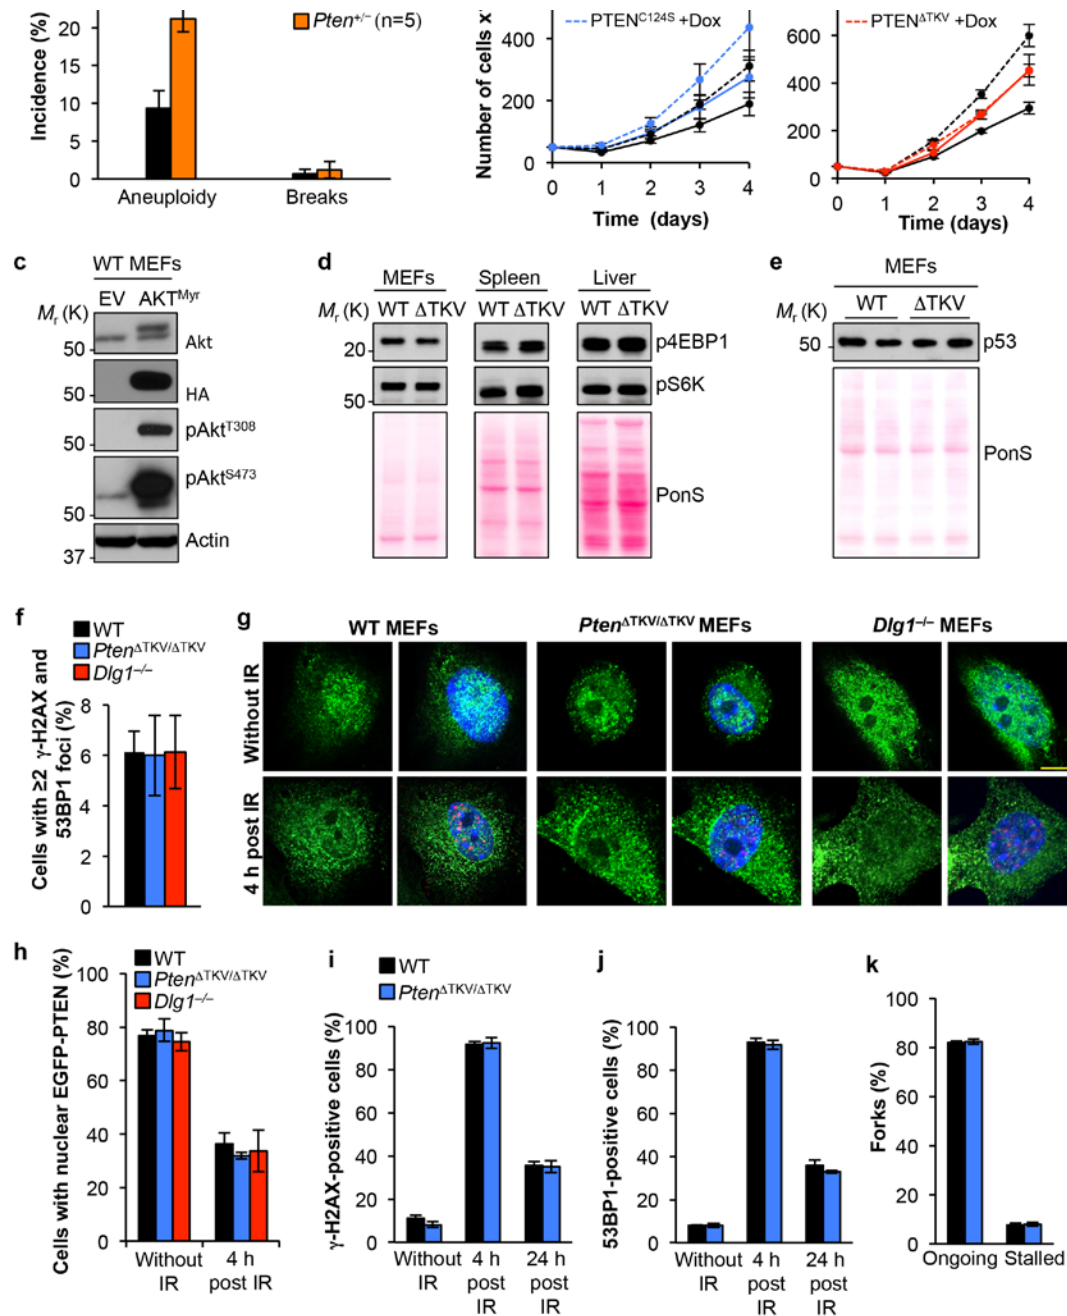

**Supplementary Figure 1** Akt signaling and structural chromosome integrity seems unaffected by PDZ-BD loss. **(a)** Analysis of metaphase spreads from P5 MEFs for abnormal chromosome numbers and DSBs. *n* = the number of independent MEF lines (50 and 100 spreads per line were analyzed for assessments of aneuploidy and chromosome breaks, respectively). **(b)** Growth curves of induced and non-induced MEFs containing the indicated *Pten* expression constructs. *n* = 3 independent MEF lines for each growth curve. Note that induction of ectopic expression of WT or mutant *PTEN* proteins had no negative impact on cell proliferation. **(c)** Western blots of lysates from WT MEFs carrying HA-tagged AKT<sup>Myr</sup> introduced by a lentiviral expression vector (EV, empty vector). **(d)** Western blots of lysates from WT and *Pten*<sup>ΔTKV/ΔTKV</sup> MEFs, spleens and livers. Pon S staining of blotted proteins served as a loading control. **(e)** Western blot of asynchronous MEF extracts. Pon S staining served as a loading control. **(f)** Incidence of

MEFs with ≥ 2 γ-H2AX/53BP1-positive foci. *n* = 3 independent MEF lines (*n* = 500 cells per line). **(g)** EGFP-PTEN localization in MEFs prior to and 4 h after 5 Gy γ-irradiation. γ-H2AX (in red) co-staining was used as a marker for DNA damage. Bar, 5 μm. **(h)** Quantitation of MEFs with nuclear EGFP-PTEN localization prior to and 4 h after γ- irradiation. *n* = 3 independent MEF lines. **(i and j)** Analysis of DSB repair following 5 Gy γ-irradiation using γ-H2AX and 53BP1 as DSB markers. Quantification was done on *n* = 3 independent MEF lines (119-191 cells per line). **(k)** Analysis of DNA replication efficiency using DNA fiber assays. This analysis was carried out on *n* = 3 independent MEF lines (102-202 replication forks per line). Data in **b** and **h-k** represent mean ± s.e.m., and in **a** and **f** mean ± s.d. Statistical significance was determined by a two-tailed unpaired t-test. \*\*\*, *P* < 0.001. Unprocessed original scans of blots can be found in Supplementary Fig. 6 and Statistics Source Data in Supplementary Table 1.

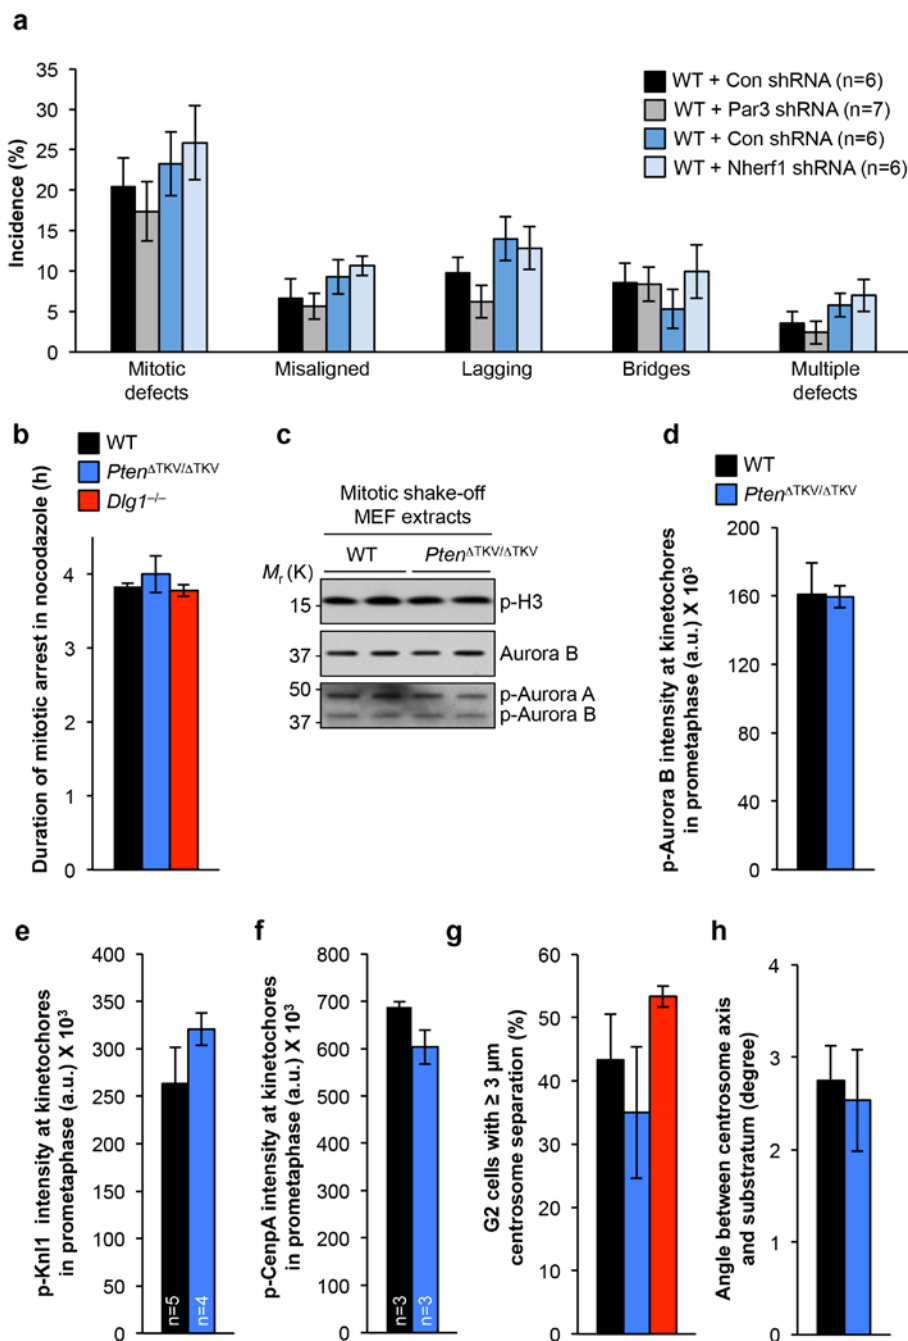

**Supplementary Figure 2** Mitotic surveillance mechanisms are not affected in *Pten*<sup>ΔTKV/ΔTKV</sup> MEFs. **(a)** WT MEFs with or without knockdown of Par3 or Nherf1 monitored for mitotic defects by live-cell imaging as they progress through mitosis. *n* = the number of independent experiments (≥ 24 cells per line). **(b)** Spindle assembly checkpoint analysis by standard nocodazole-challenge assay. Mitotic arrest duration of *Pten*<sup>ΔTKV/ΔTKV</sup> and *Dlg1*<sup>-/-</sup> MEFs after nocodazole addition. *n* = 3 MEF lines per genotype (8–26 cells per line). **(c–f)** Error correction machinery analysis in *Pten*<sup>ΔTKV/ΔTKV</sup> MEFs. **(c)** Western blot analysis of mitotic lysates of WT and *Pten*<sup>ΔTKV/ΔTKV</sup> MEFs immunoblotted for Aurora B and p-Aurora, demonstrating that this core component of this machinery was normally expressed and activated in mitosis. P-histone H3 (p-H3) served as a control for equal loading of mitotic cells. **(d)** Quantitation of p-Aurora B kinase signals at inner centromeres in

prometaphase MEFs, demonstrating proper Aurora B in *Pten*<sup>ΔTKV/ΔTKV</sup> MEFs. *n* = 3 independent cell lines (10 cells per line) **(e and f)** Quantitation of two key kinetochore-associated substrates of Aurora B, p-Knl1 **(e)** and p-CenpA **(f)**, further indicating that error correction was normal in cells lacking the Pten PDZ-BD. *n* = the number of independent MEF lines (12–20 cells per line) **(g)** Incidence of MEFs with centrosome distance ≥ 3 μm in G2 as a measure for early centrosome separation. Costaining with p-Histone H3 served to identify cells in G2 phase. *n* = 3 independent MEF lines (20 cells per line). **(h)** Analysis of planar spindle orientation. *n* = 3 independent MEF lines (10 cells per line). Data in **a, d–h** represent mean ± s.e.m. and in **b** represent mean ± s.d. Statistical significance was determined by a two-tailed unpaired t-test. Unprocessed original scans of blots can be found in Supplementary Fig. 6 and Statistics Source Data in Supplementary Table 1.

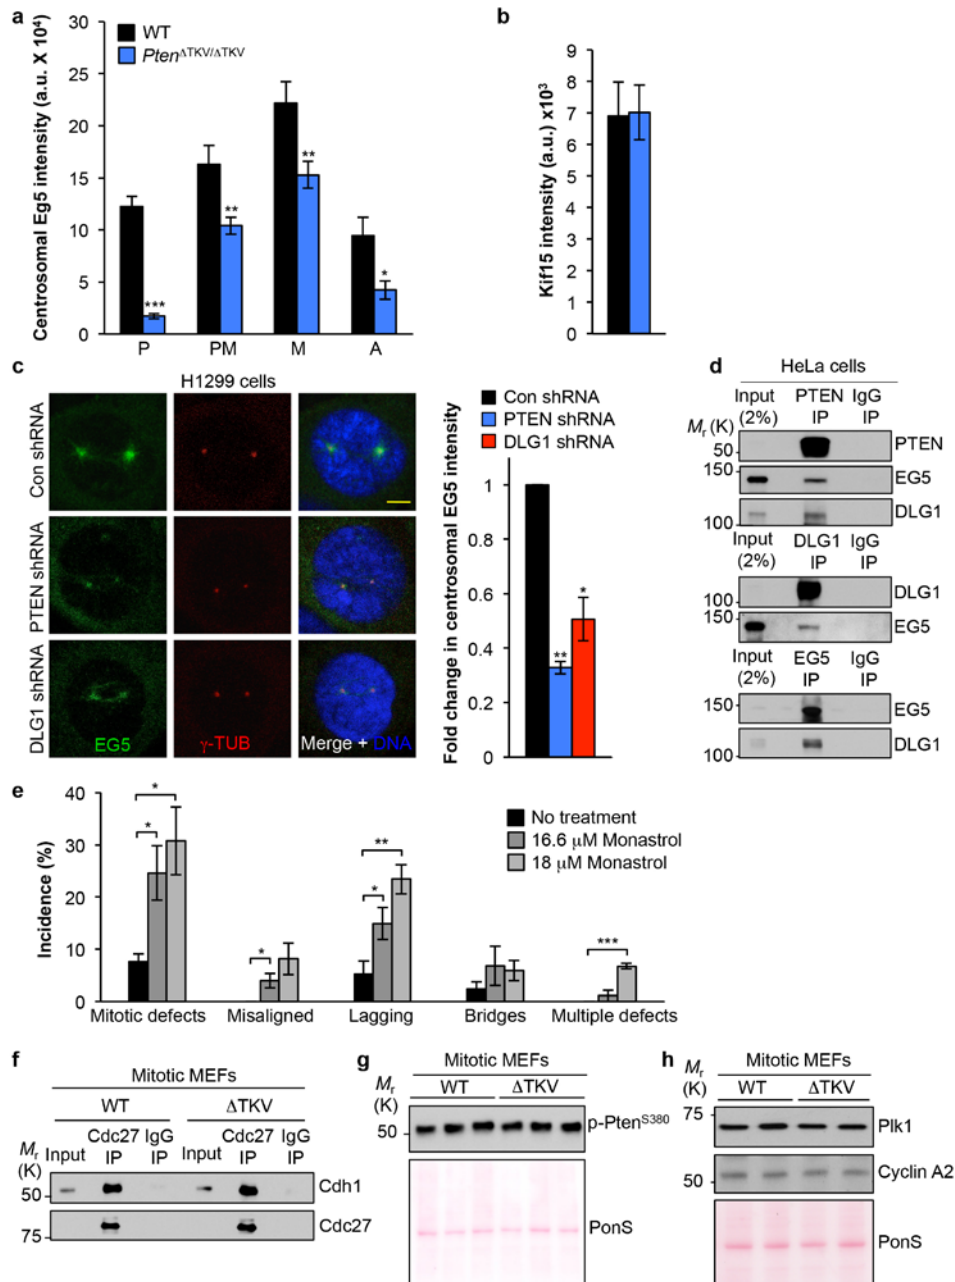

**Supplementary Figure 3** WT MEFs subjected to partial Eg5 inhibition have similar chromosome segregation errors as *Pten*<sup>ΔTKV/ΔTKV</sup> and *Dlg1*<sup>-/-</sup> MEFs. **(a)** Quantification of Eg5 signal at astral microtubules and centrosomes at various mitotic stages. *n* = 15 MEFs per mitotic stage per genotype. **(b)** Quantitation of Kif15 signals at centrosomes. The analysis was done on *n*=3 independent MEF lines per genotype (5 cells per line). **(c)** Images of HT1299 prophase cells immunostained for EG5 and  $\gamma$ -tubulin 72 h after transduction with the indicated shRNA lentiviruses (bar, 5  $\mu$ m). Quantitation of EG5 signals at centrosomes for *n* = 3 independent immunostaining experiments (10-15 cells per experiment). **(d)** Analysis of complex formation between endogenous PTEN, DLG1 and EG5 in mitotic HeLa cells by reciprocal co-immunoprecipitation assays. Blots are representative of 2 independent experiments. **(e)** WT MEFs treated with indicated amount of monastrol monitored for mitotic defects by live-cell imaging as they progress through mitosis. The analysis was performed on *n* = 5 independent MEF lines (>13-37 cells per line). **(f-h)** APC/C<sup>Cdh1</sup>

assembly is unperturbed in *Pten*<sup>ΔTKV/ΔTKV</sup> cells. **(f)** Immunoblots of mitotic WT and *Pten*<sup>ΔTKV/ΔTKV</sup> MEF lysates subjected to immunoprecipitation with Cdc27 or control (IgG) antibodies and analyzed by western blotting with Cdh1 and Cdc27 antibodies. Blots are representative for 3 independent experiments. **(g)** Western blot analysis of mitotic MEF lysates for p-Pten<sup>S380</sup>. Phosphorylation of S380 by Plk1 during mitosis controls Pten association with Cdh1<sup>18</sup>; this regulatory mechanism is unperturbed when the Pten PDZ-BD is lacking. **(h)** Western blot analysis of mitotic lysates of WT and *Pten*<sup>ΔTKV/ΔTKV</sup> MEFs for select mitotic substrates that are subject to degradation by APC/C<sup>Cdh1</sup>. Pon S staining of blotted proteins served as a loading control. Data in **a-c**, **e** represent mean  $\pm$  s.e.m. Statistical significance in **a** and **b** was determined by a two-tailed unpaired *t*-test, in **c** by a one-sample *t*-test against a theoretical mean of unity, and in **e** by a two-tailed paired *t*-test. \* *p* < 0.05, \*\* *p* < 0.01, \*\*\* *p* < 0.001. Unprocessed original scans of blots can be found in Supplementary Fig. 6 and Statistics Source Data in Supplementary Table 1.

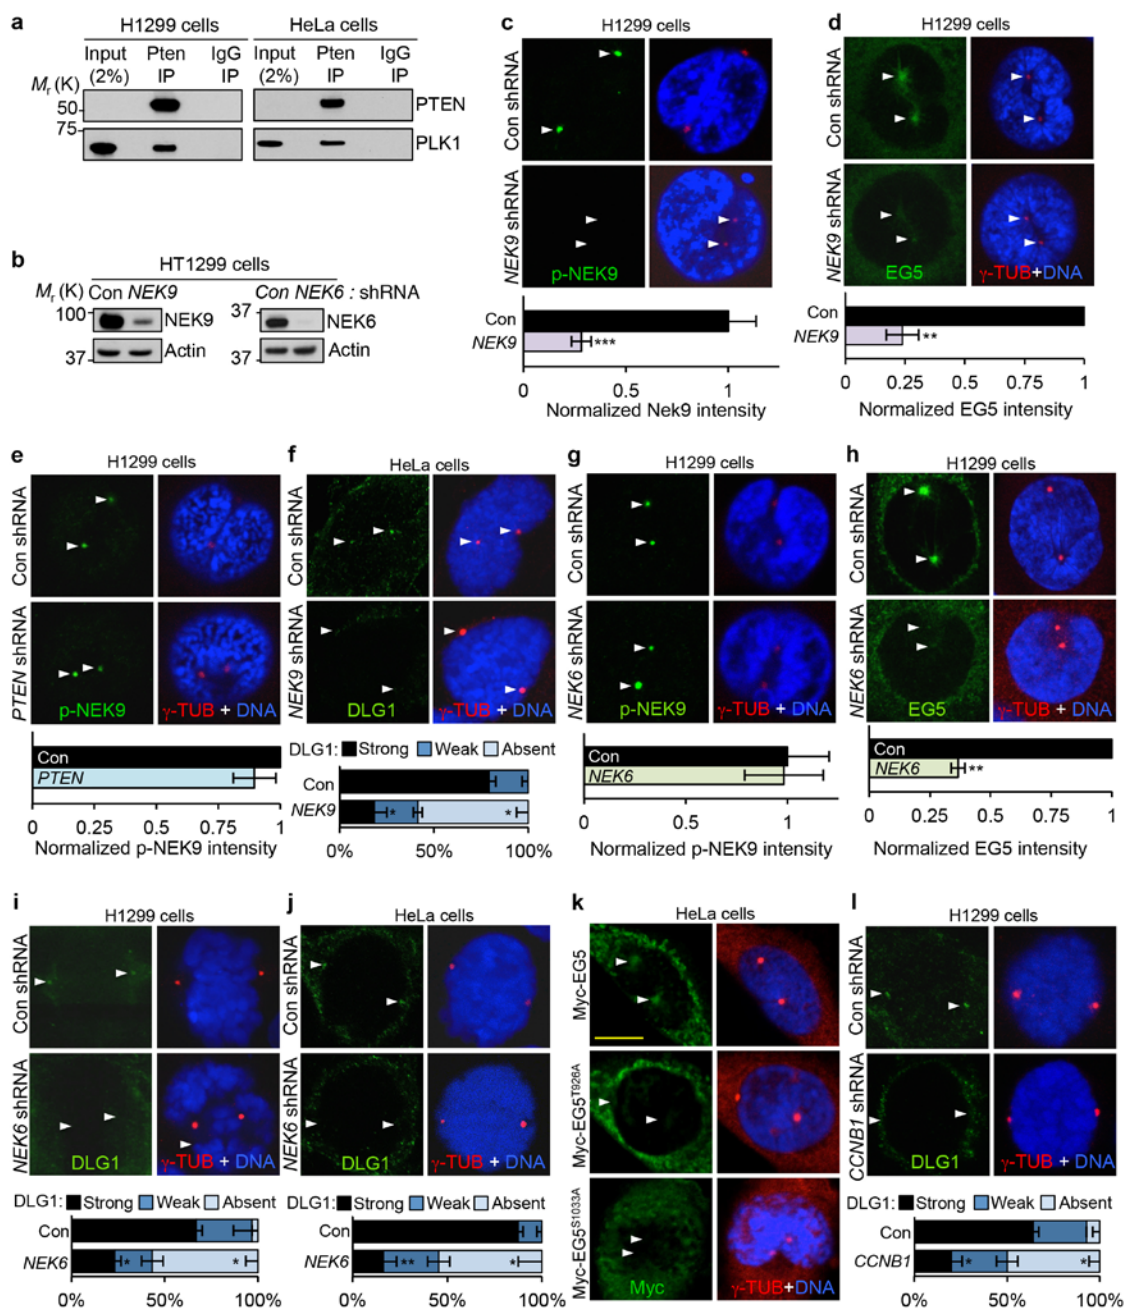

**Supplementary Figure 4** DLG1-mediated docking of EG5 to PTEN at centrosomes is dependent on NEK9-NEK6 and cyclin B1-CDK1 kinase activity. **(a)** Immunoblots of mitotic HT1299 or HeLa extracts subjected to immunoprecipitation with PTEN antibody or control IgG and analyzed with the indicated antibodies. Blots are representative for 2 independent experiments. **(b)** Western blots of lysates from HT1299 cells transduced with *NEK6* or *NEK9* shRNA or non-silencing shRNA negative control (Con) lentiviruses and analyzed 72 h later. **(c)** Prophase cells stained for p-NEK9<sup>T210</sup> after transduction with *NEK9* shRNA or non-silencing control shRNA. Centrosome-associated p-NEK9<sup>T210</sup> was quantified. **(d)** As **c** stained for EG5. Centrosome-associated EG5 was quantified. **(e)** Prophase cells stained for p-NEK9<sup>T210</sup> after transduction with *PTEN* shRNA or non-silencing control shRNA. Centrosome-associated p-NEK9<sup>T210</sup> was quantified. **(f)** As **c** stained for DLG1. Centrosome-associated DLG1 was

quantified. **(g)** Prophase cells stained for p-NEK9<sup>T210</sup> after transduction with *NEK6* shRNA or non-silencing control shRNA. Centrosome-associated p-NEK9<sup>T210</sup> was quantified. **(h)** As **g** stained for EG5. Centrosome-associated EG5 was quantified. **(i)** and **(j)** As **g** stained for DLG1. Centrosome-associated DLG1 was quantified. **(k)** Prophase cells transiently expressing Myc-tagged WT or mutant EG5 immunostained for ectopic EG5. **(l)** As **i** but for prophase cells depleted for *CCNB1*. All data presented are mean  $\pm$  s.e.m.  $n = 3$  independent experiments in **d-f**, **h-j** and **l** (10-18 cells per condition) and  $n = 10$  cells in **c** and **g**. Statistical significance in **d**, **e** and **h** was determined by a one-sample *t*-test against a theoretical mean of unity, in **c** and **g** by an unpaired *t*-test and in **f**, **i**, **j** and **l** by a two-tailed paired *t*-test. \*  $p < 0.05$ , \*\*  $p < 0.01$ , \*\*\*  $p < 0.001$ . Unprocessed original scans of blots can be found in Supplementary Fig. 6 and Statistics Source Data in Supplementary Table 1.



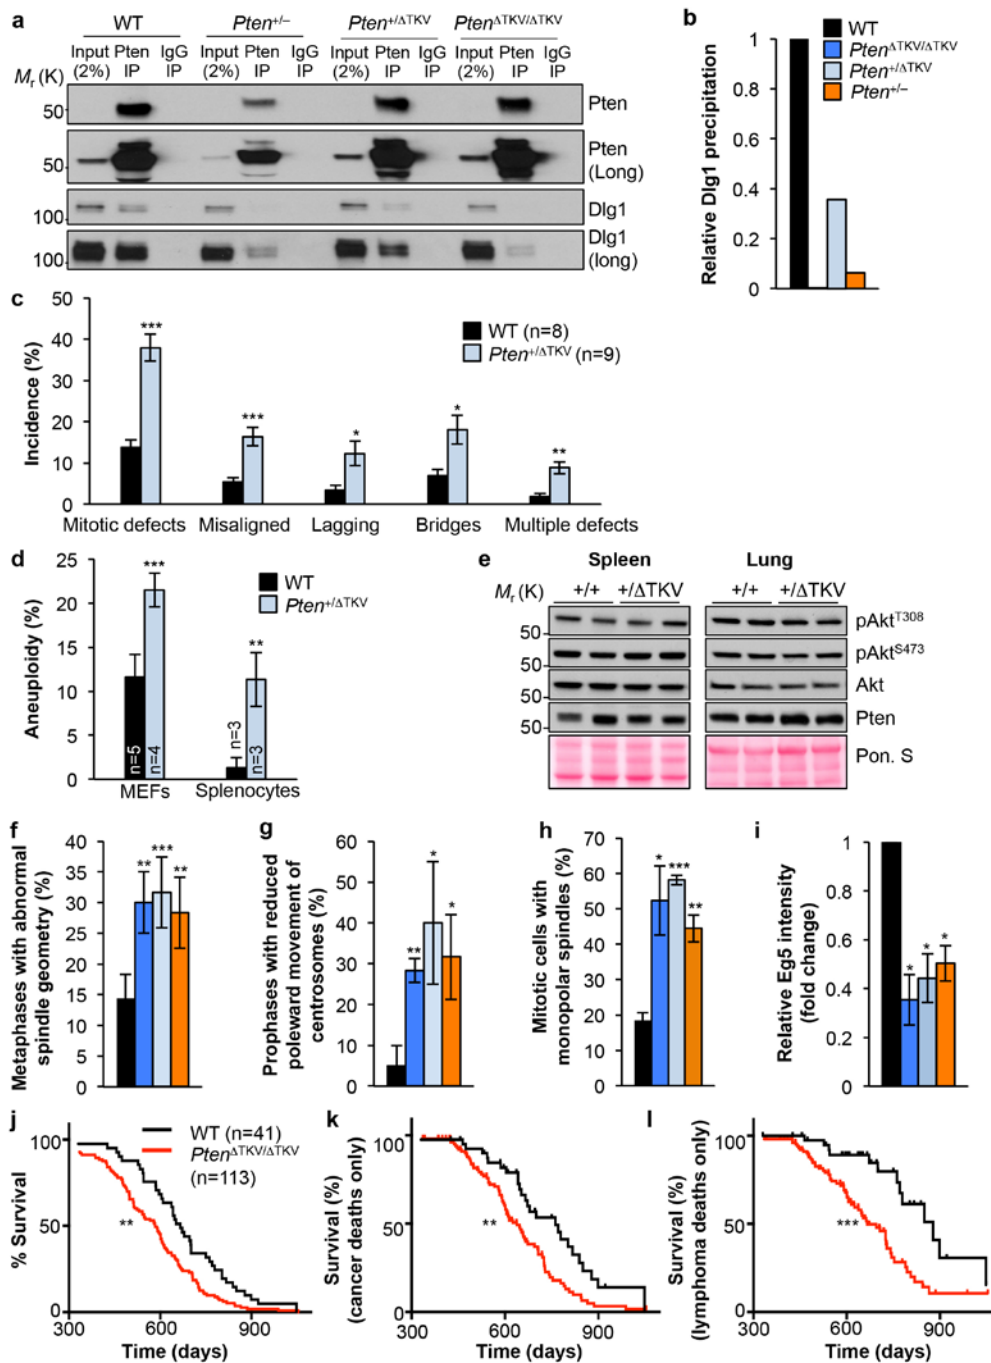

**Supplementary Figure 5** Partial Pten PDZ-BD loss perturbs spindle assembly and cause chromosome missegregation. **(a)** Immunoblots of mitotic MEF extracts precipitated with indicated antibodies and analyzed for Dlg1 (representative for 2 experiments). **(b)** Relative Pten-Dlg1 complex formation (mean of 2 independent experiments). **(c)** MEFs analyzed for mitotic defects. n = the number of independent MEF lines (29-71 cells/line). **(d)** Karyotyping of MEFs and splenocytes from 5-month-old mice. n = the number of independent MEF lines or spleens (50 spreads/MEF line or spleen). **(e)** Western blots of lysates from indicated tissues of WT and *Pten*<sup>+/ $\Delta$ TKV</sup> mice. **(f)** Incidence of spindle asymmetry. n = the number of independent MEF lines (20 cells/line). **(g)** Incidence of prophases with reduced centrosome movement. n=3 independent MEF lines (20 cells/line). **(h)** Monopolar spindle formation in 16.6  $\mu$ M monastrol. n=3 independent MEF lines (64-95 cells/line). **(i)** Quantification of Eg5 signal at astral microtubules and centrosomes in prophase. n=3 independent MEF lines/genotype (10 cells/line). **(j)** Overall survival curves showing

that *Pten* <sup>$\Delta$ TKV/ $\Delta$ TKV</sup> lifespan is shortened. **(k)** Survival curves of WT and *Pten* <sup>$\Delta$ TKV/ $\Delta$ TKV</sup> mice dying with tumors showing that *Pten* <sup>$\Delta$ TKV/ $\Delta$ TKV</sup> mice develop tumors faster, although the overall tumor incidence was unchanged (66% in WT versus 67% in *Pten* <sup>$\Delta$ TKV/ $\Delta$ TKV</sup> mice). The tumor spectrum of both WT and *Pten* <sup>$\Delta$ TKV/ $\Delta$ TKV</sup> mice consisted of lymphomas, sarcomas, and liver and lung tumors. Of these, the incidence of lymphomas was significantly increased in *Pten* <sup>$\Delta$ TKV/ $\Delta$ TKV</sup> mice (50% versus 32% in WT mice). **(l)** Survival curves of mice dying with lymphoma showing that lymphomas are not only more prevalent in *Pten* <sup>$\Delta$ TKV/ $\Delta$ TKV</sup> mice, but also develop faster. WT and *Pten* <sup>$\Delta$ TKV/ $\Delta$ TKV</sup> values in **f** and **g** were taken from Fig. 2f, h. Data shown in **b**, **d**, **f** and **g** are the mean  $\pm$  s.d., in **c**, **h** and **i** the mean  $\pm$  s.e.m. Statistical significance in **c**, **d**, **f**-**h** was determined by unpaired *t*-test, and in **b**, **i** by a one-sample *t*-test against a theoretical mean of unity, and by Log-rank tests in **j**-**l**. \* *p* < 0.05, \*\* *p* < 0.01, \*\*\* *p* < 0.001. See Supplementary Fig. 6 for unprocessed blot scans and Supplementary Table 1 for Statistics Source Data.

Un-cropped blots Fig. 1d

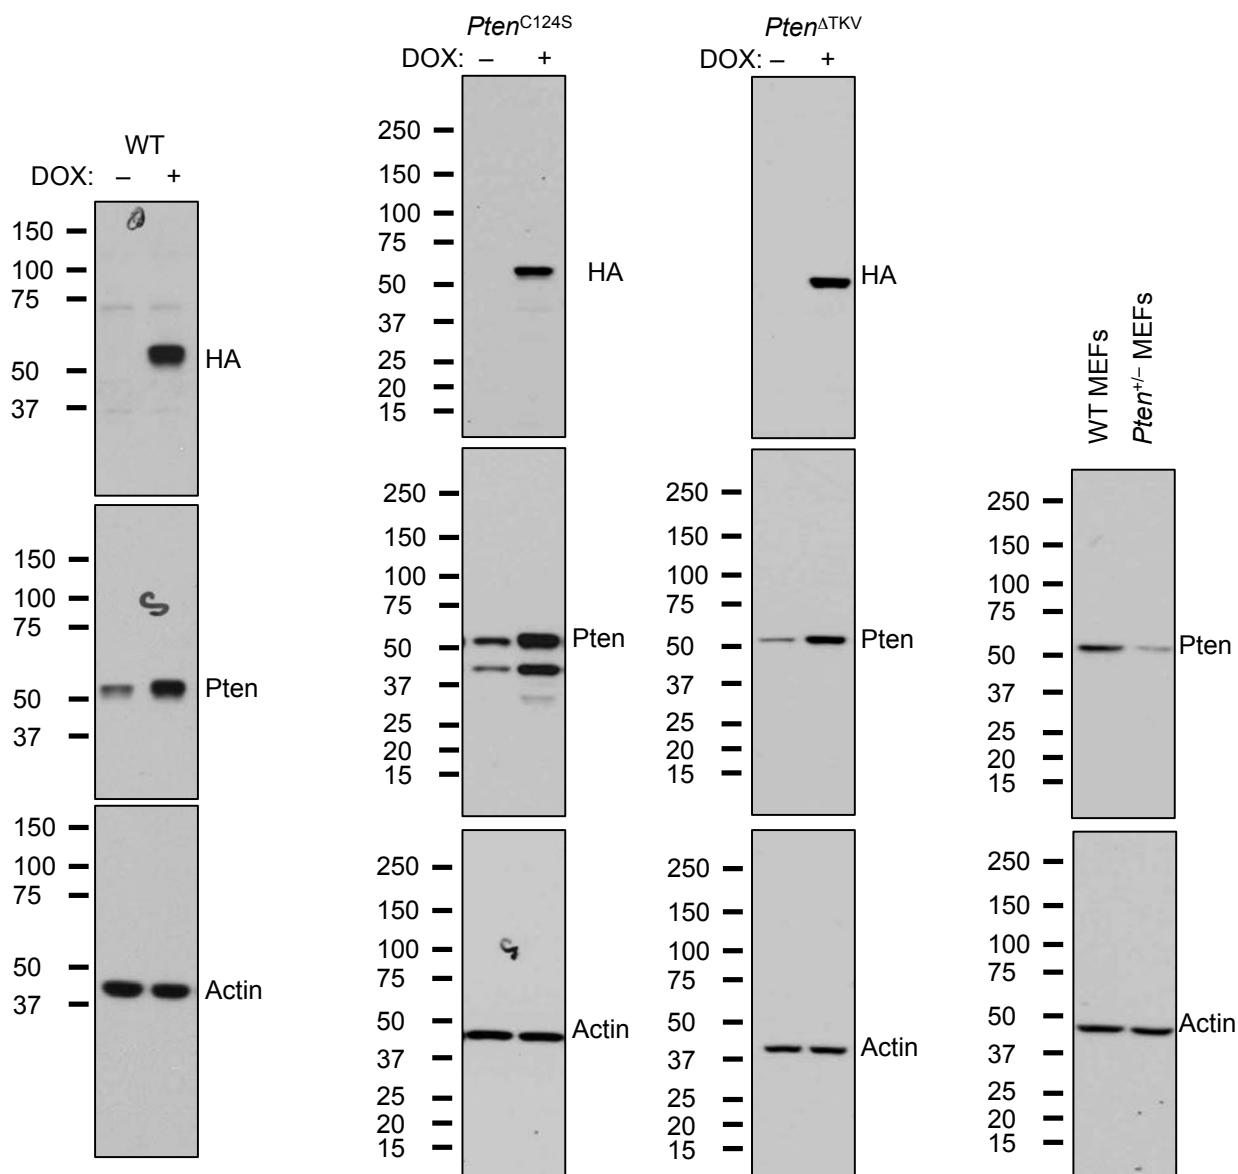

Supplementary Figure 6 Unprocessed scans of blots

Un-cropped blots Fig. 1f

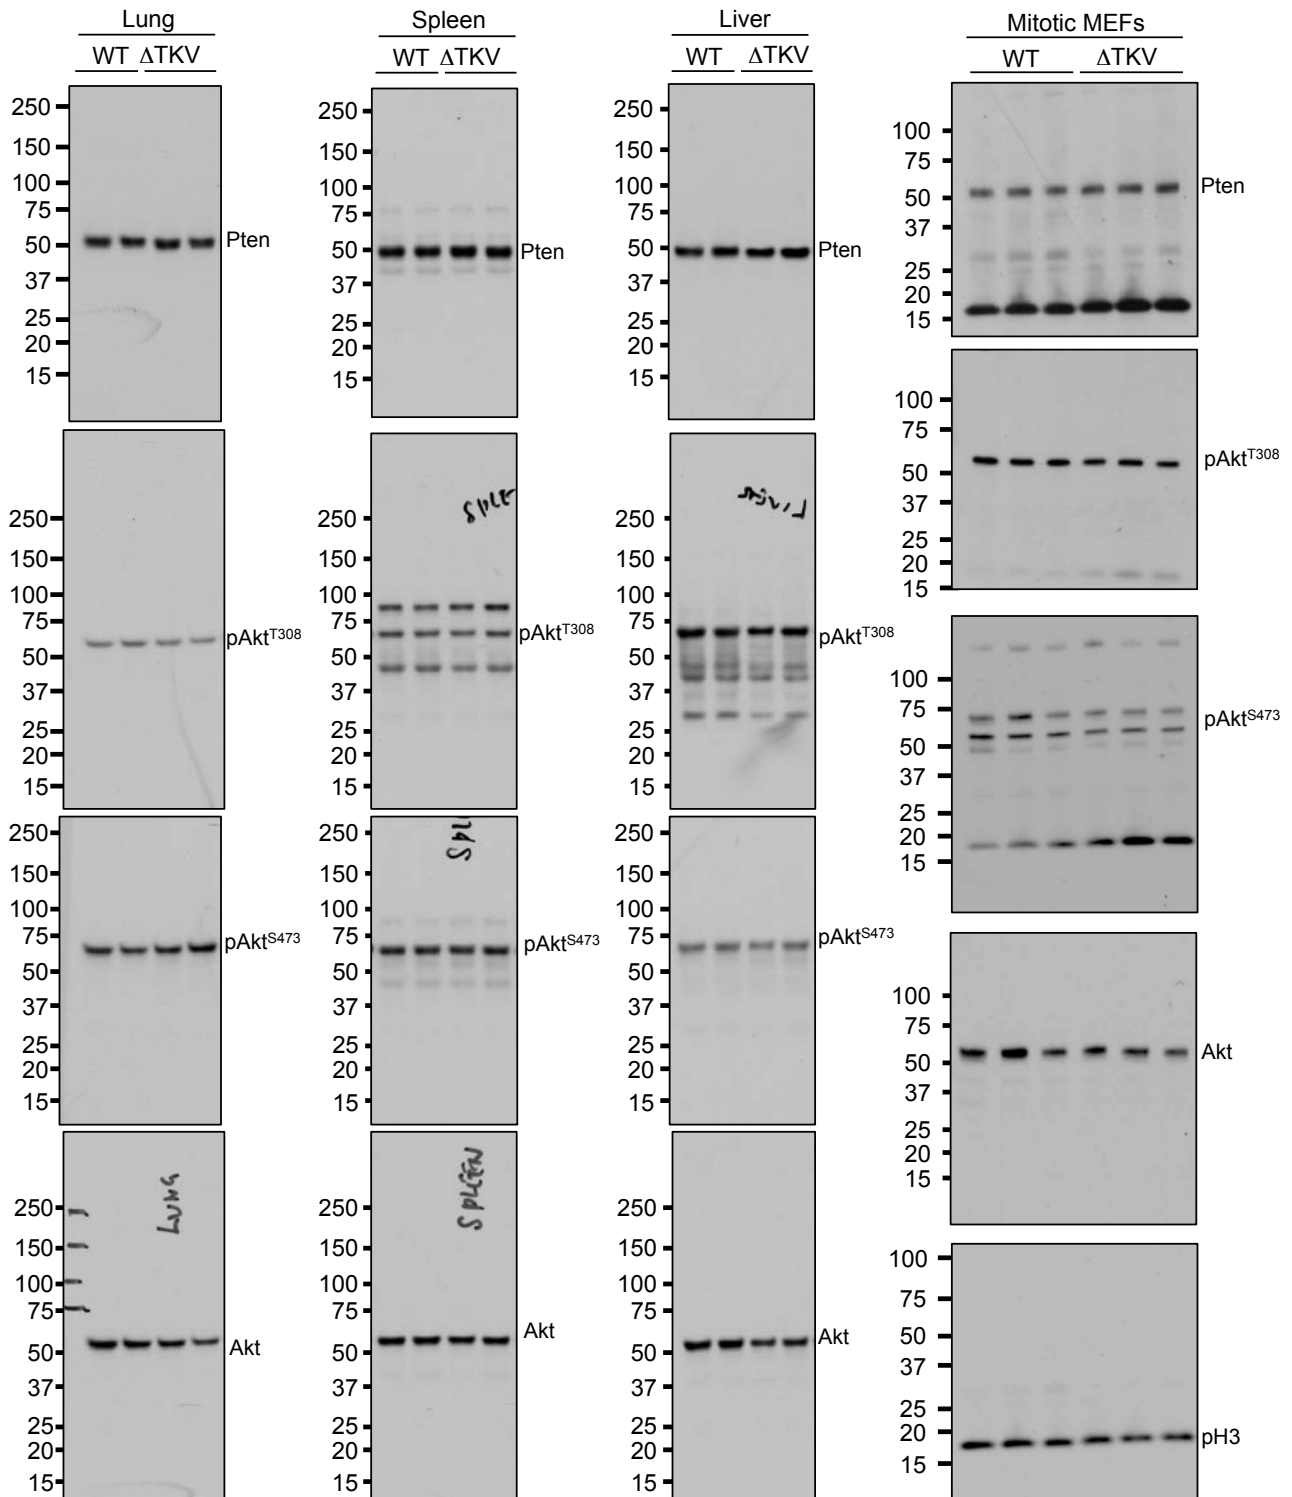

Supplementary Figure 6 Unprocessed scans of blots

Un-cropped blots Fig. 2a and d

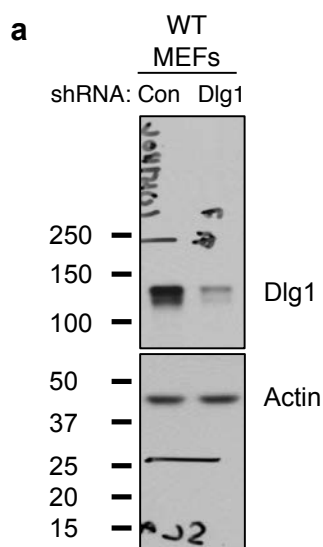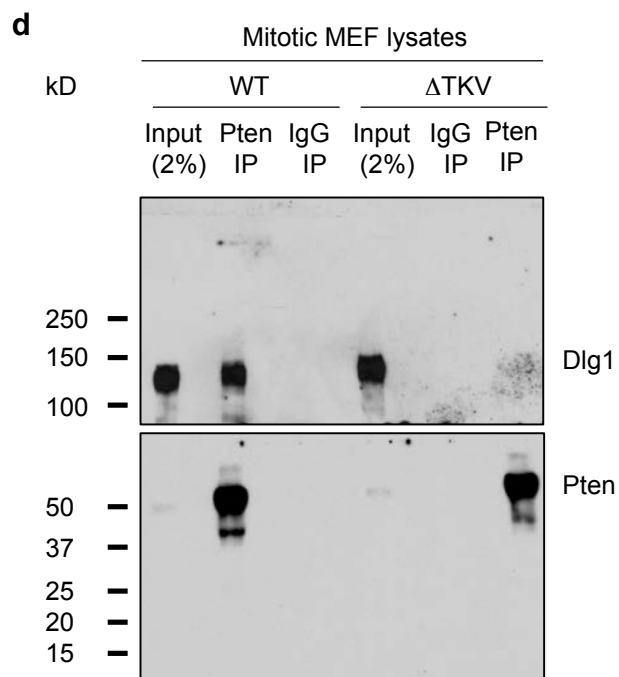



Un-cropped blots Fig. 3f

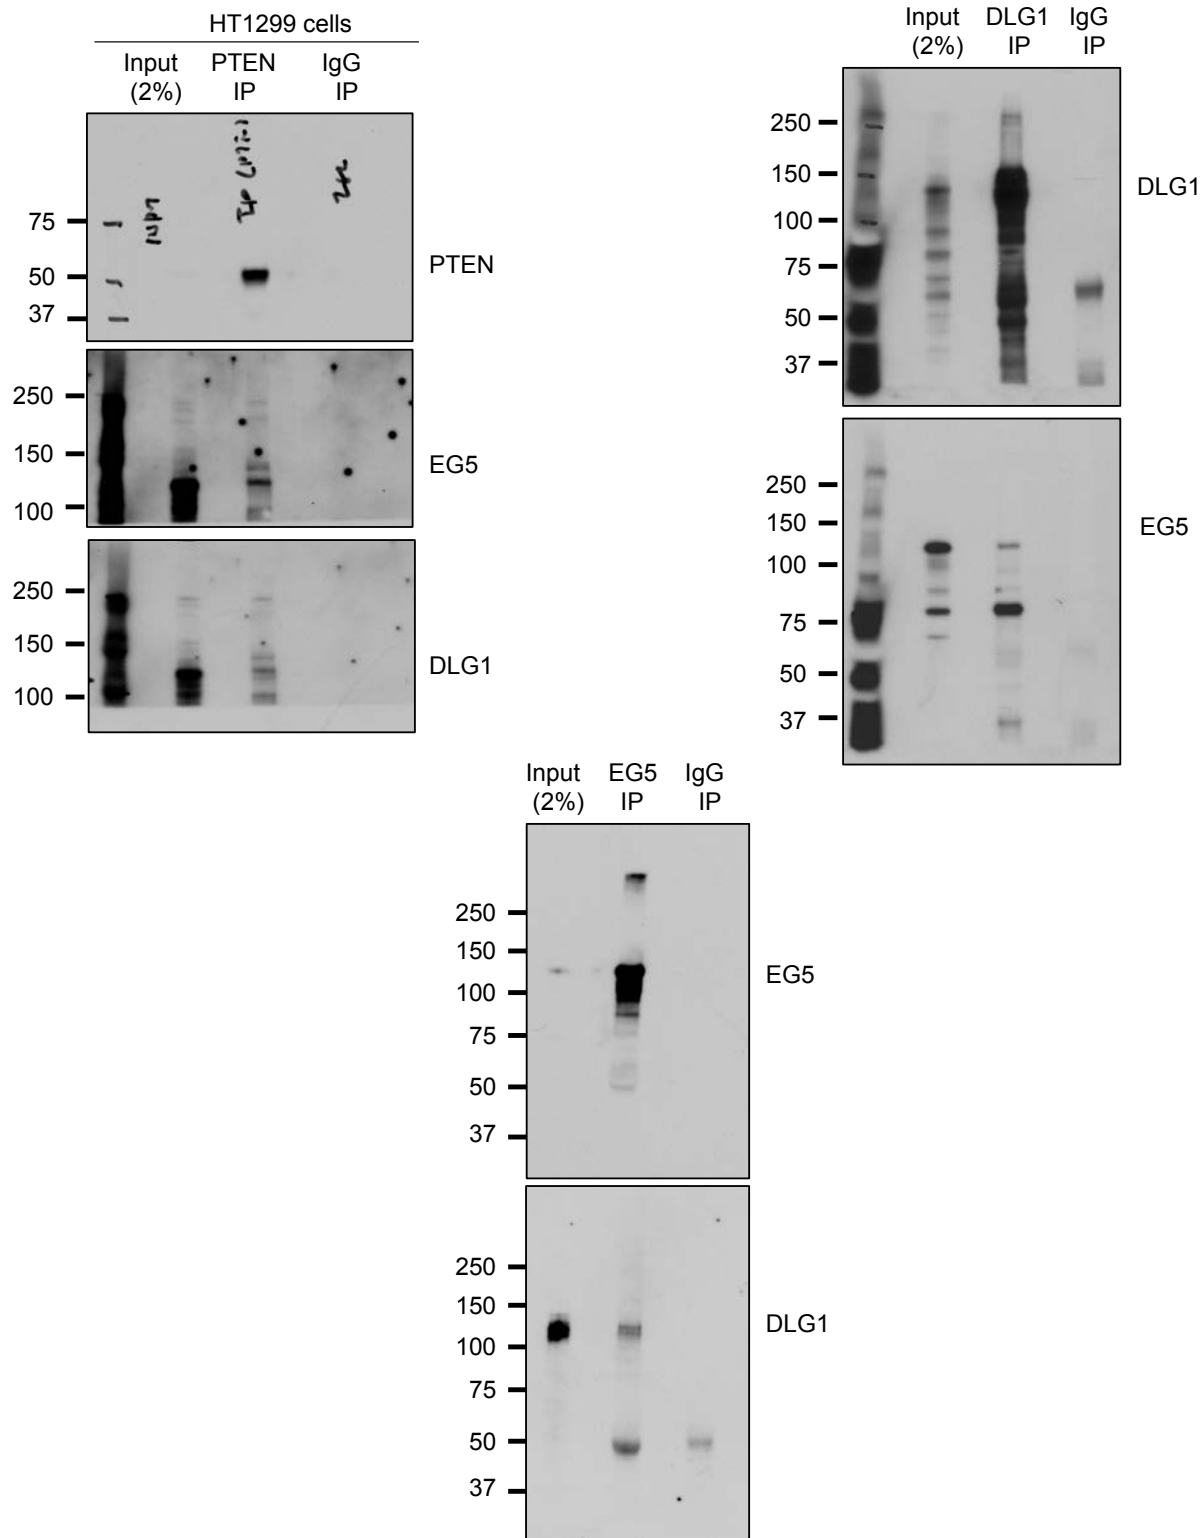

Supplementary Figure 6 continued

Un-cropped blots Fig. 3g and h

**g**

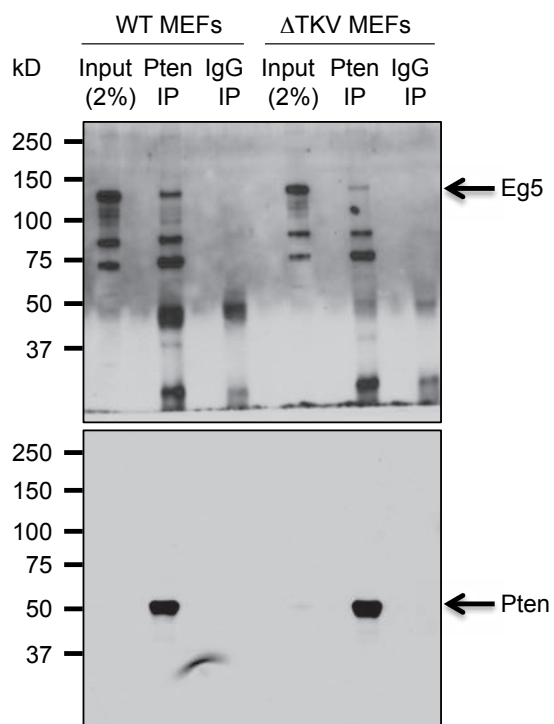

**h**

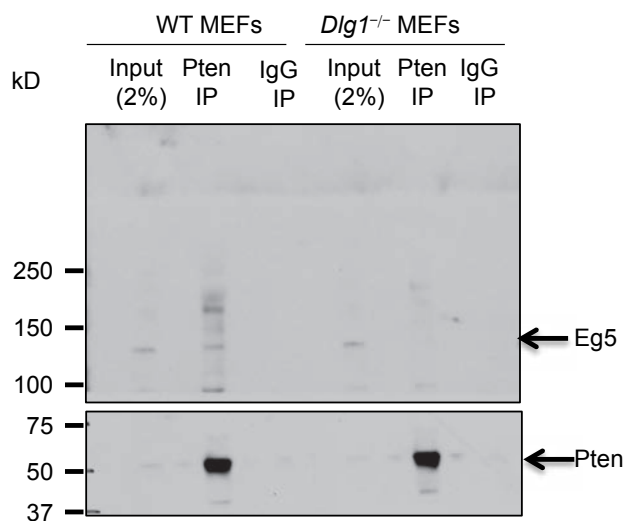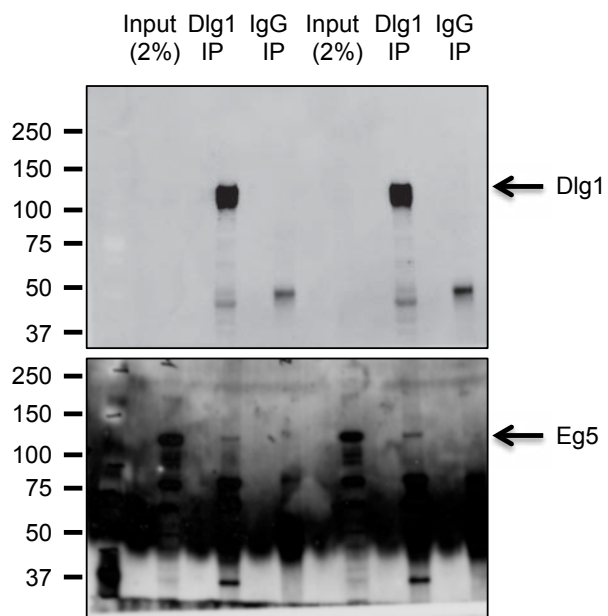

Supplementary Figure 6 continued

Un-cropped blots Fig. 4e and j

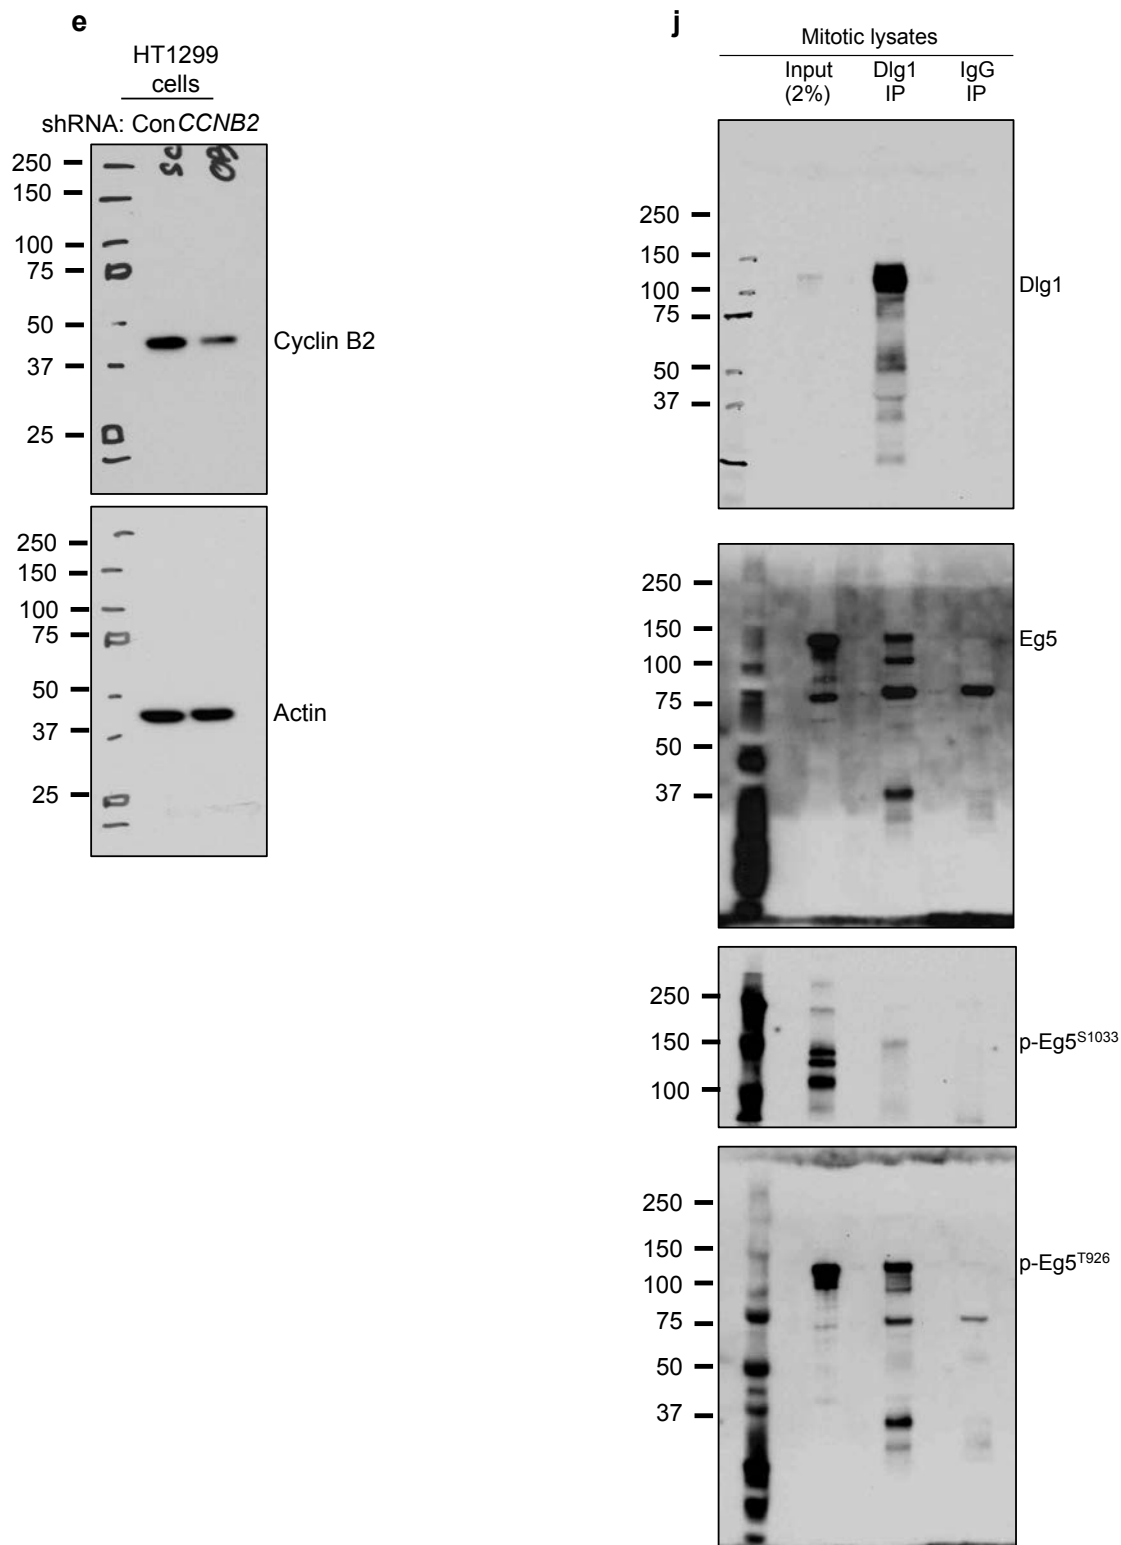

Supplementary Figure 6 continued

Un-cropped blots Fig. 4k

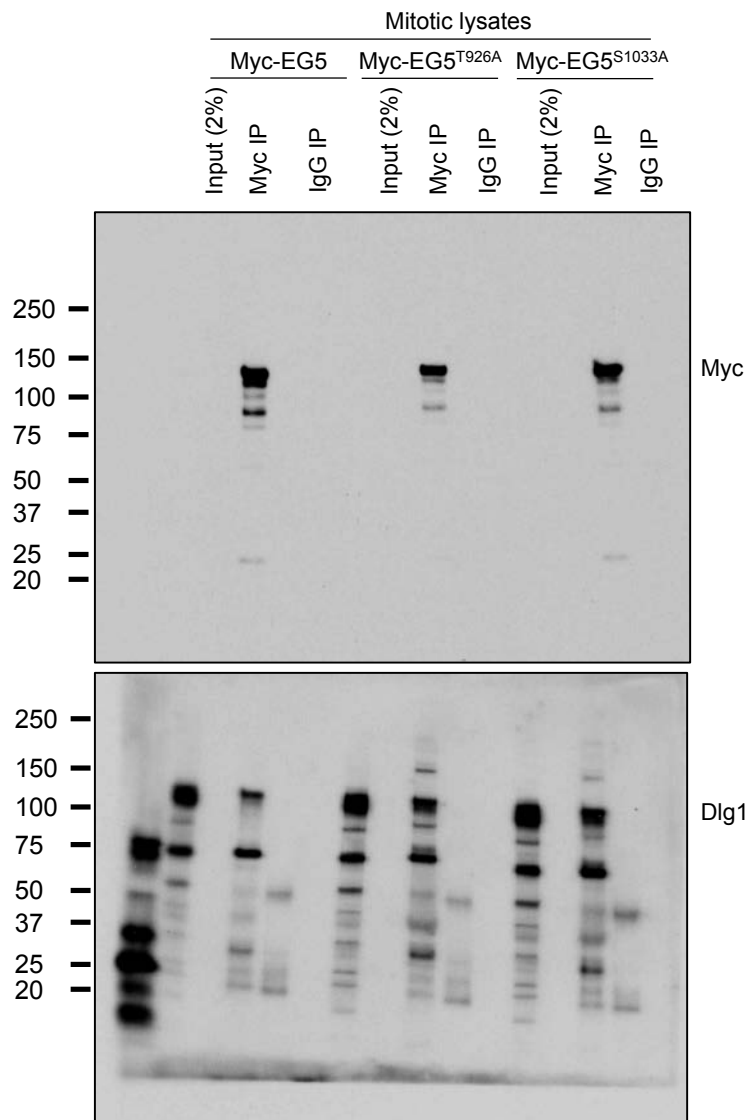

Un-cropped blots Fig. 5f

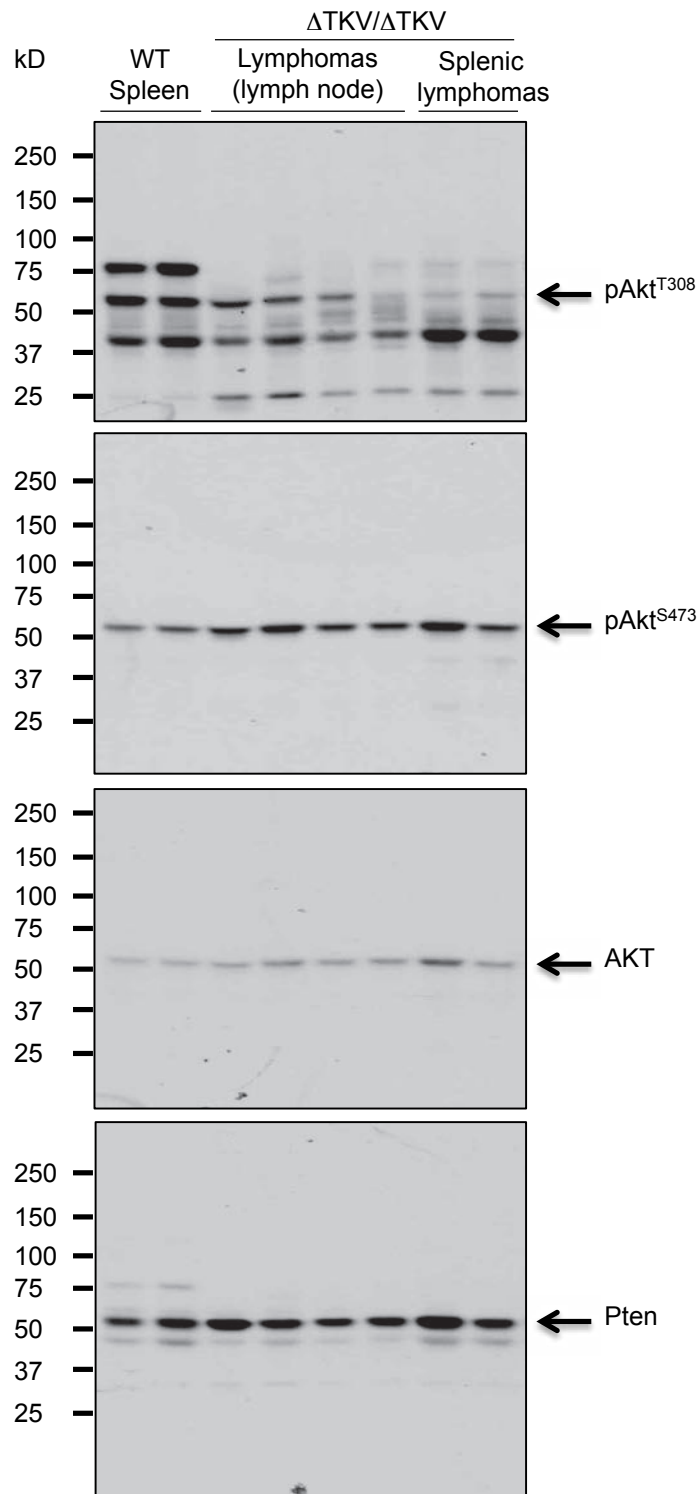

Supplementary Figure 6 continued

Un-cropped blots Supplementary Fig. 1c-e

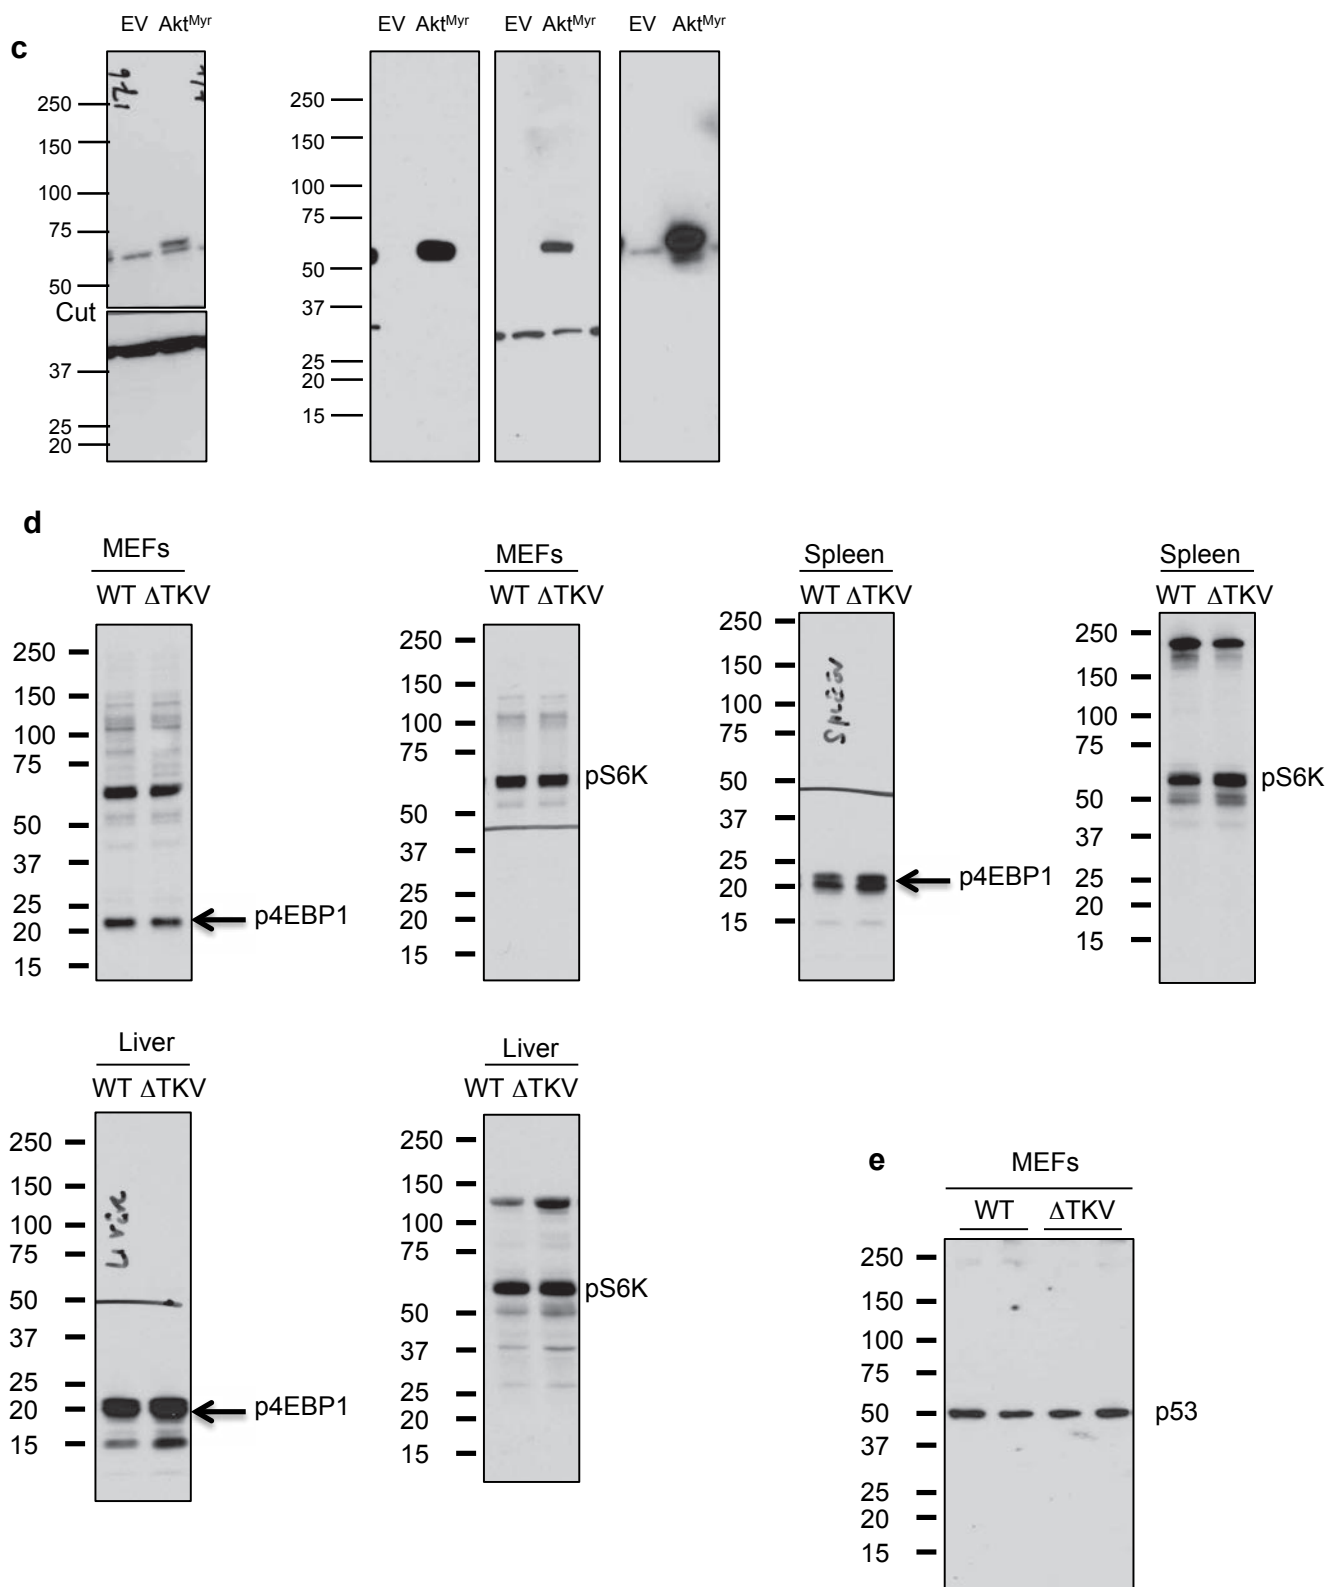

Supplementary Figure 6 continued



Un-cropped blots Supplementary Fig. 2c

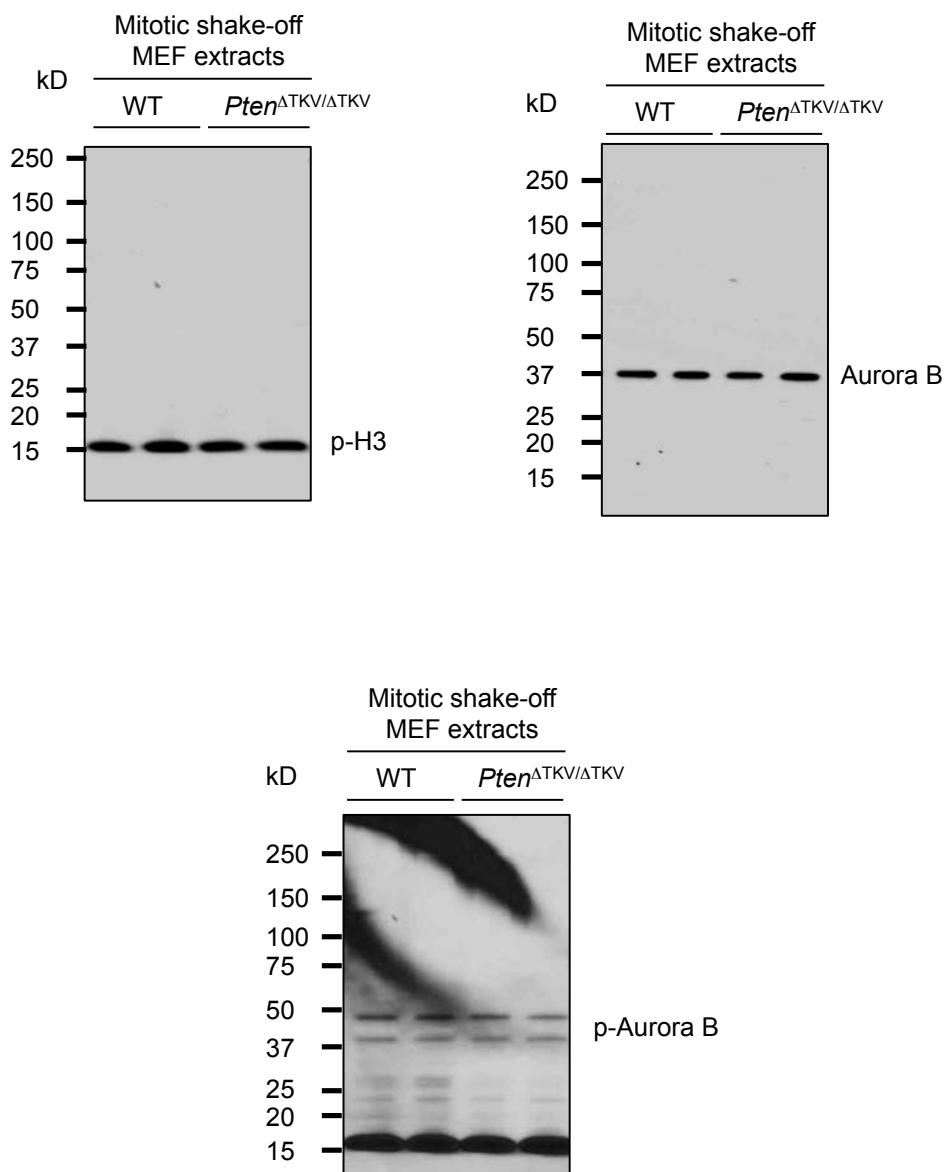

Supplementary Figure 6 continued

Un-cropped blots Supplementary Fig. 3b

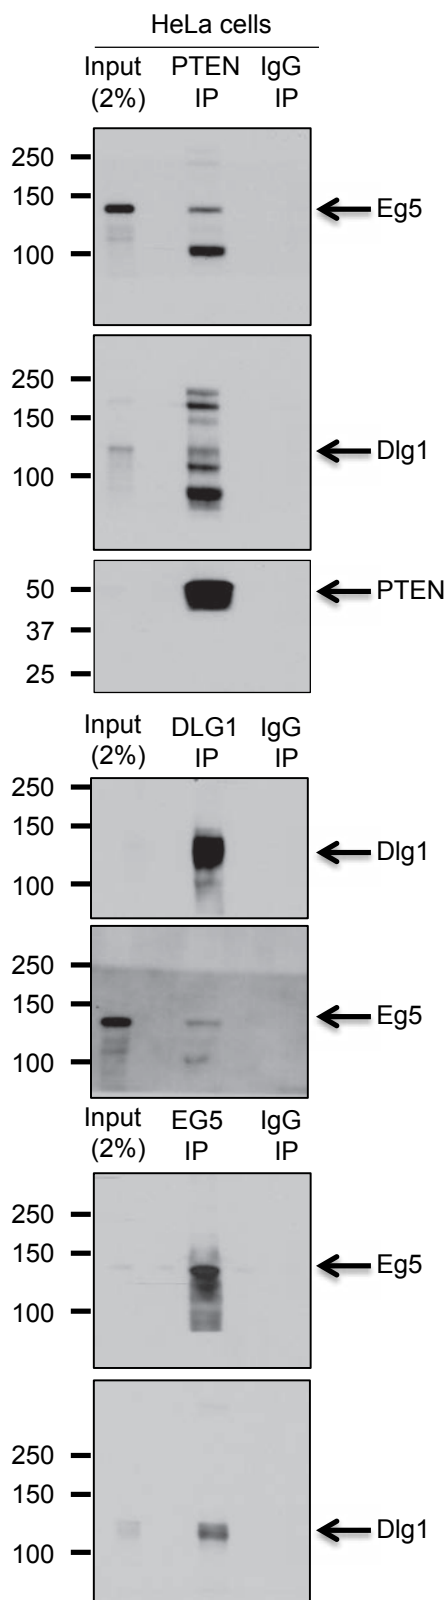

Supplementary Figure 6 continued

**Un-cropped blots Supplementary Fig. 3d-f**

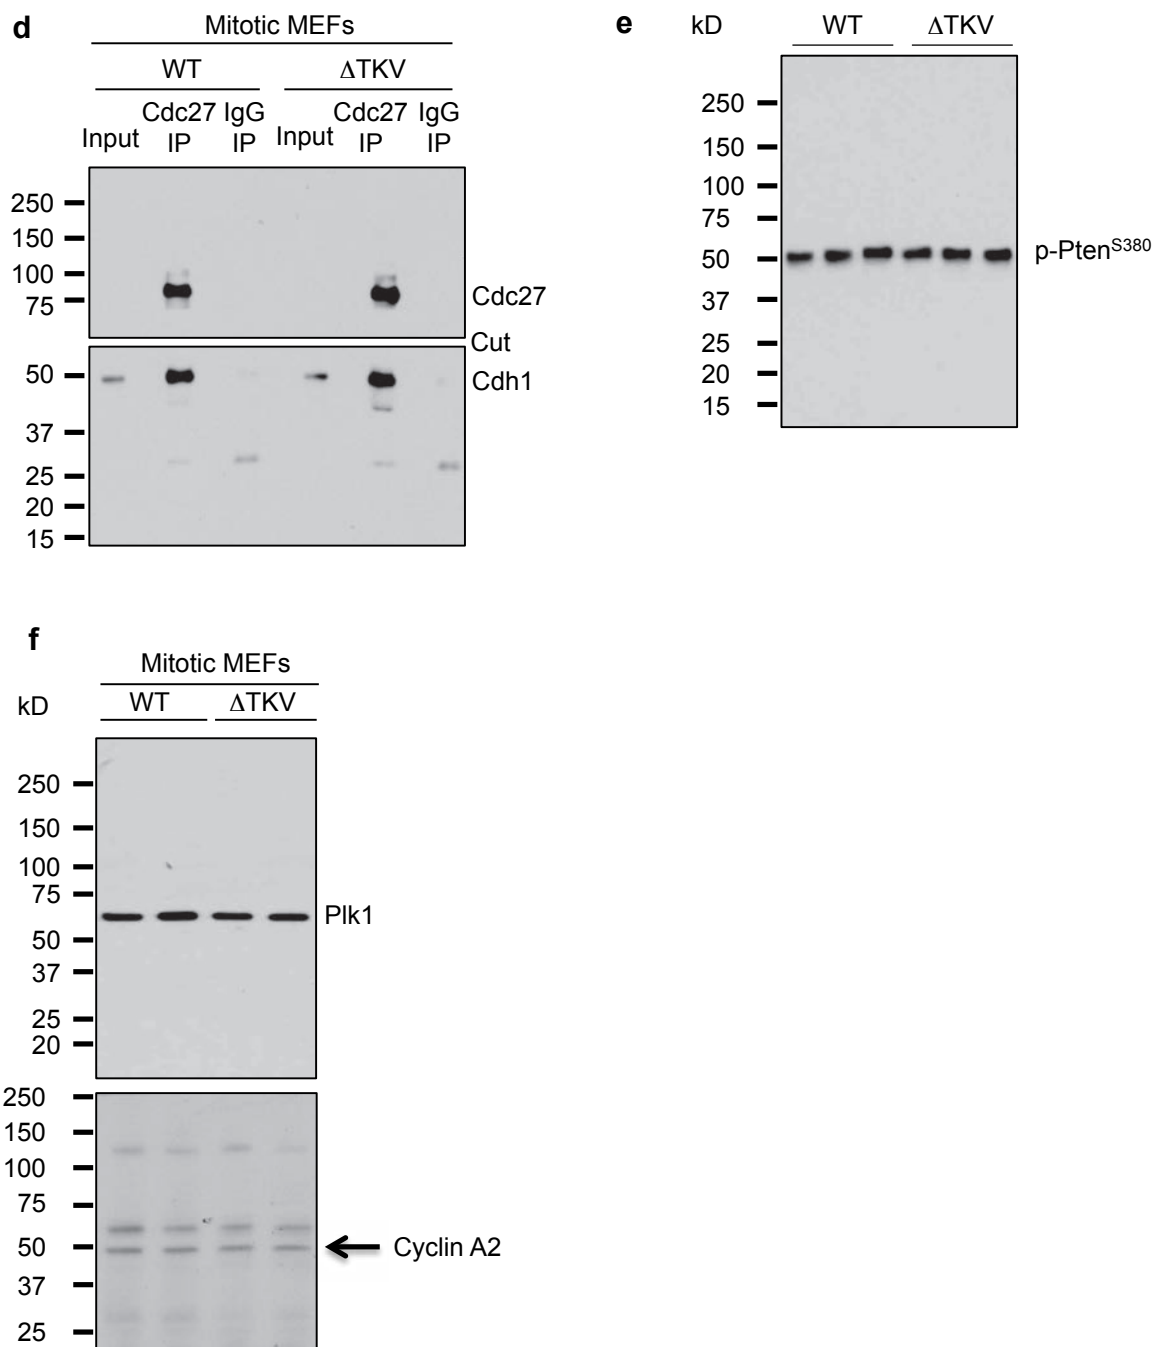

Supplementary Figure 6 continued

**Un-cropped blots Supplementary Fig. 4a and b**

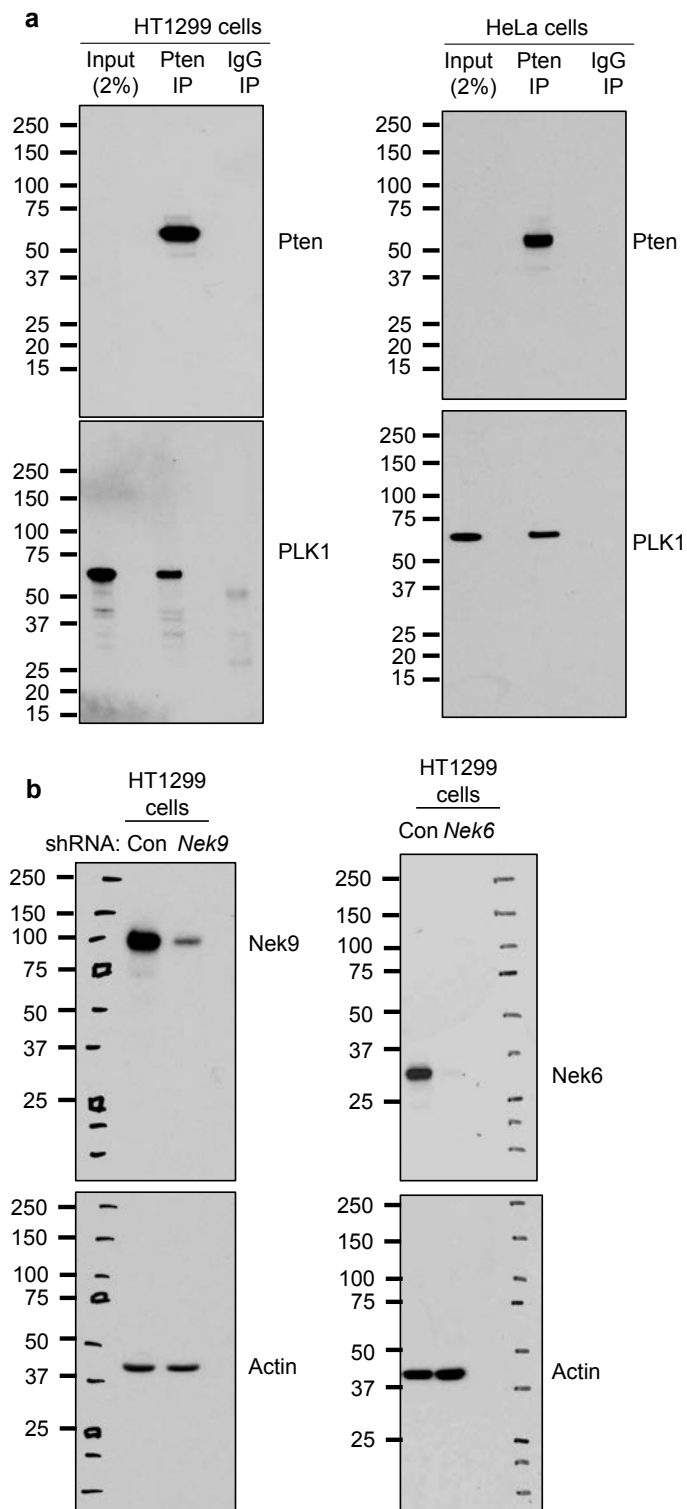

Supplementary Figure 6 continued

Un-cropped blots Supplementary Fig. 5a

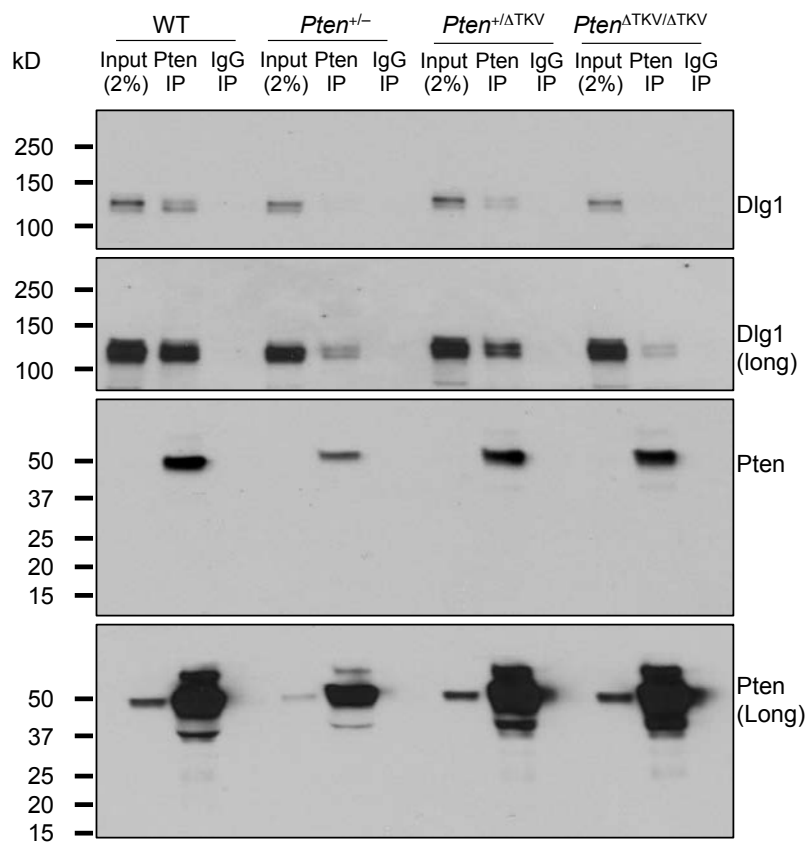

Supplementary Figure 6 continued

Un-cropped blots Supplementary Fig. 5e

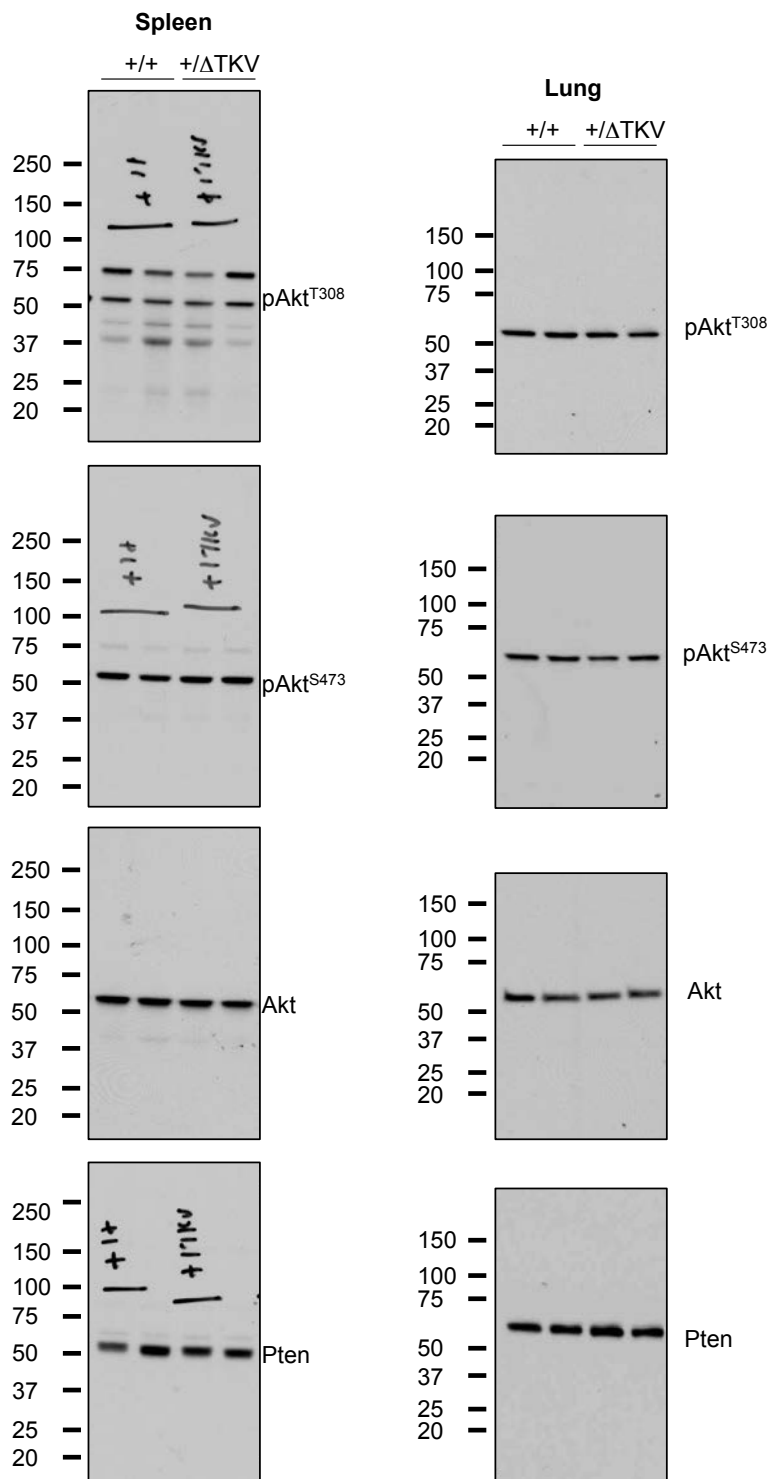

Supplementary Figure 6 continued



**Supplementary Table 1** Statistics Source data
